# Supplementary material
Source: HighWire-hosted journal article supplement (https://erj.ersjournals.com/content/55/5/2000166)
Supplement: inline-supplementary-material-1 [file inline-supplementary-material-1.pdf]

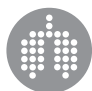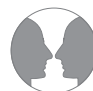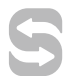

SHAREABLE PDF

# A rational approach to e-cigarettes: challenging ERS policy on tobacco harm reduction

John Britton<sup>1</sup>, Jacob George<sup>2</sup>, Linda Bauld<sup>3</sup>, Sanjay Agrawal<sup>4</sup>, John Moxham<sup>5</sup>, Deborah Arnott<sup>6</sup>, Ann McNeill<sup>7</sup> and Nicholas S. Hopkinson <sup>8</sup>

**Affiliations:** <sup>1</sup>UK Centre for Tobacco and Alcohol Studies, University of Nottingham, London, UK. <sup>2</sup>Molecular and Cellular Medicine, Dundee University, Dundee, UK. <sup>3</sup>Usher Institute, College of Medicine and Veterinary Medicine, University of Edinburgh, Edinburgh, UK. <sup>4</sup>Institute for Lung Health, University of Leicester, Leicester, UK. <sup>5</sup>Faculty of Life Sciences and Medicine, King's College London, London, UK. <sup>6</sup>Action on Smoking and Health (ASH UK), London, UK. <sup>7</sup>Institute of Psychiatry, Psychology and Neuroscience, King's College London, London, UK. <sup>8</sup>National Heart and Lung Institute, Imperial College, London, UK.

**Correspondence:** Nicholas Hopkinson, National Heart and Lung Institute, Imperial College, London, Royal Brompton Hospital Campus, London SW3 6NP, UK. E-mail: n.hopkinson@ic.ac.uk

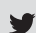

@ERSpublications

**The current ERS Tobacco Control Committee statement rejecting harm reduction does not reflect the state of evidence around the effectiveness and safety of e-cigarettes and may be harmful if implemented** <http://bit.ly/39ix5iO>

**Cite this article as:** Britton J, George J, Bauld L, *et al.* A rational approach to e-cigarettes: challenging ERS policy on tobacco harm reduction. *Eur Respir J* 2020; 55: 2000166 [<https://doi.org/10.1183/13993003.00166-2020>].

This single-page version can be shared freely online.

## To the Editor:

The respiratory community is united in its desire to reduce and eliminate the harm caused by tobacco smoking, which is at present on course to kill one billion people in the 21st century. The stated policy of the European Respiratory Society is to strive “constantly to promote strong and evidence-based policies to reduce the burden of tobacco related diseases”. In our view, the recent ERS Tobacco Control Committee statement on tobacco harm reduction [1], though well-intentioned, appears to be based on a number of false premises and draws its conclusions from a partial account of available data. It also presents a false dichotomy between the provision of “conventional” tobacco control and harm reduction approaches. We therefore respond, in turn, to the seven arguments presented against the adoption of harm reduction in the Committee’s statement.
